# Supplementary material for: Talin1 targeting potentiates anti-angiogenic therapy by attenuating invasion and stem-like features of glioblastoma multiforme
Source: PubMed Central journal article supplement (PMC4694986; doi:10.18632/oncotarget.4835), 2015-08-20
Supplement: oncotarget-06-27239-s001.pdf [file oncotarget-06-27239-s001.pdf]

## **SUPPLEMENTARY TABLES**

**Supplementary Table S1: Genes up-regulated in the Bevacizumab-treated U-87MG tumors**

**Supplementary Table S2: Genes down-regulated in the Bevacizumab-treated U-87MG tumors**
